# Supplementary material for: Correction: Ethanolic gasoline, a lignocellulosic advanced biofuel
Source: Royal Society of Chemistry journal article supplement (doi:10.1039/d2se90024f), 2022-01-01
Supplement: d2se90024f2.pdf [file d2se90024f2.pdf]

## Supplementary Material

### Experimental RCM New Data

| Gasoline type experiments,<br>phi=1 |                 |                  |                         |            |          |         |           |          |
|-------------------------------------|-----------------|------------------|-------------------------|------------|----------|---------|-----------|----------|
| test#                               | P_initial(torr) | T_initial(deg C) | Diluent                 | P_EOC(bar) | T_EOC(K) | 1st_ign | total_ign | reactive |
| 1                                   | 560             | 85               | Nitrogen_25%/CO2<br>75% | 19.49      | 668.50   | 3.09    | 15.91     | 1        |
| 2                                   | 560             | 85               | Nitrogen_25%/CO2<br>75% | 19.41      | 668.00   | 5.62    | 15.48     | 1        |
| 3                                   | 560             | 85               | Nitrogen_25%/CO2<br>75% | 19.41      | 668.05   | 5.85    | 15.76     | 1        |
| 4                                   | 560             | 85               | Nitrogen_25%/CO2<br>75% |            |          |         |           | 0        |
| 5                                   | 560             | 100              | Nitrogen_25%/CO2<br>75% | 19.22      | 689.70   | 4.51    | 15.03     | 1        |
| 6                                   | 560             | 100              | Nitrogen_25%/CO2<br>75% | 19.22      | 689.70   | 4.59    | 14.75     | 1        |
| 7                                   | 560             | 100              | Nitrogen_25%/CO2<br>75% | 19.22      | 689.70   | 4.53    | 14.91     | 1        |
| 8                                   | 560             | 100              | Nitrogen_25%/CO2<br>75% |            |          |         |           | 0        |
| 9                                   | 513             | 85               | Nitrogen_70%/CO2<br>30% | 19.42      | 732.20   | 1.56    | 15.82     | 1        |
| 10                                  | 511             | 85               | Nitrogen_70%/CO2<br>30% | 19.39      | 732.50   | 1.16    | 15.58     | 1        |
| 11                                  | 512             | 85               | Nitrogen_70%/CO2<br>30% | 19.56      | 733.50   | 1.71    | 15.39     | 1        |
| 12                                  | 512             | 85               | Nitrogen_70%/CO2<br>30% |            |          |         |           | 0        |
| 13                                  | 512             | 100              | Nitrogen_70%/CO2<br>30% | 19.36      | 757.55   |         | 18.36     | 1        |
| 14                                  | 512             | 100              | Nitrogen_70%/CO2<br>30% | 19.32      | 757.25   |         | 17.87     | 1        |
| 15                                  | 512             | 100              | Nitrogen_70%/CO2<br>30% | 19.35      | 757.50   |         | 17.95     | 1        |
| 16                                  | 512             | 100              | Nitrogen_70%/CO2<br>30% |            |          |         |           | 0        |
| 17                                  | 512             | 125              | Nitrogen_70%/CO2<br>30% | 18.95      | 796.50   |         | 18.86     | 1        |
| 18                                  | 520             | 125              | Nitrogen_70%/CO2<br>30% | 19.40      | 797.65   |         | 17.16     | 1        |
| 19                                  | 520             | 125              | Nitrogen_70%/CO2<br>30% | 19.37      | 797.40   |         | 18.13     | 1        |
| 20                                  | 520             | 125              | Nitrogen_70%/CO2<br>30% |            |          |         |           | 0        |
| 21                                  | 434             | 90               | Nitrogen_75%/Argo       | 18.64      | 843.00   |         | 8.80      | 1        |

|         |      |     |                        |       |        |       |       |   |
|---------|------|-----|------------------------|-------|--------|-------|-------|---|
|         |      |     | n_25%                  |       |        |       |       |   |
| 22      | 450  | 90  | Nitrogen_75%/Argon_25% | 19.50 | 844.70 |       | 9.57  | 1 |
| 23      | 450  | 90  | Nitrogen_75%/Argon_25% | 19.56 | 845.25 |       | 8.65  | 1 |
| 24      | 453  | 90  | Nitrogen_75%/Argon_25% |       |        |       |       | 0 |
| 25      | 450  | 105 | Nitrogen_75%/Argon_25% | 19.16 | 870.65 |       | 6.37  | 1 |
| 26      | 450  | 105 | Nitrogen_75%/Argon_25% | 19.20 | 871.05 |       | 5.64  | 1 |
| 27      | 450  | 105 | Nitrogen_75%/Argon_25% | 19.31 | 872.10 |       | 6.04  | 1 |
| 28      | 450  | 105 | Nitrogen_75%/Argon_25% |       |        |       |       | 0 |
| 29      | 585  | 85  | CO2_100%               | 19.61 | 642.20 | 10.19 | 22.84 | 1 |
| 30      | 585  | 85  | CO2_100%               | 19.70 | 642.65 | 9.83  | 21.77 | 1 |
| 31      | 585  | 85  | CO2_100%               | 19.74 | 642.90 | 9.85  | 22.04 | 1 |
| 32      | 585  | 85  | CO2_100%               |       |        |       |       | 0 |
| 33      | 1170 | 100 | CO2_100%               | 38.21 | 661.15 | 3.61  | 7.96  | 1 |
| 34      | 1178 | 100 | CO2_100%               | 38.79 | 662.05 | 4.09  | 7.74  | 1 |
| 35      | 1180 | 100 | CO2_100%               | 39.16 | 662.85 | 4.09  | 7.52  | 1 |
| 36      | 1180 | 100 | CO2_100%               |       |        |       |       | 0 |
| 37      | 1180 | 115 | CO2_100%               | 38.85 | 683.70 | 1.82  | 5.97  | 1 |
| 38      | 1180 | 115 | CO2_100%               | 39.08 | 684.35 | 1.40  | 5.74  | 1 |
| 39      | 1180 | 115 | CO2_100%               | 38.65 | 683.10 | 2.62  | 5.91  | 1 |
| 40      | 1180 | 115 | CO2_100%               |       |        |       |       | 0 |
| 41      | 1137 | 110 | Nitrogen_30%/CO2_70%   | 40.49 | 714.65 |       | 3.86  | 1 |
| 42      | 1130 | 110 | Nitrogen_30%/CO2_70%   | 40.40 | 715.15 |       | 3.97  | 1 |
| 43      | 1134 | 110 | Nitrogen_30%/CO2_70%   | 40.81 | 715.95 |       | 3.89  | 1 |
| 44      | 1130 | 110 | Nitrogen_30%/CO2_70%   |       |        |       |       | 0 |
| phi=0.5 |      |     |                        |       |        |       |       |   |
| 45      | 535  | 90  | N2_50%/CO2_50%         | 19.90 | 740.65 | 6.58  | 60.51 | 1 |
| 46      | 537  | 90  | N2_50%/CO2_50%         | 20.00 | 740.85 | 6.33  | 59.89 | 1 |
| 47      | 537  | 90  | N2_50%/CO2_50%         | 19.96 | 740.50 | 4.92  | 59.96 | 1 |
| 48      | 535  | 90  | N2_50%/CO2_50%         |       |        |       |       | 0 |
| 49      | 1070 | 90  | N2_50%/CO2_50%         | 40.20 | 742.10 |       | 17.49 | 1 |
| 50      | 1070 | 90  | N2_50%/CO2_50%         | 40.16 | 741.90 |       | 17.18 | 1 |
| 51      | 1070 | 90  | N2_50%/CO2_50%         | 40.18 | 742.00 |       | 17.34 | 1 |
| 52      | 1070 | 90  | N2_50%/CO2_50%         |       |        |       |       | 0 |
| 53      | 535  | 105 | N2_50%/CO2_50%         | 19.69 | 764.50 |       | 60.02 | 1 |

|    |      |     |                      |       |        |      |       |   |
|----|------|-----|----------------------|-------|--------|------|-------|---|
| 54 | 535  | 105 | N2_50%/CO2_50%       | 19.68 | 764.45 |      | 59.99 | 1 |
| 55 | 535  | 105 | N2_50%/CO2_50%       | 19.70 | 764.60 |      | 59.06 | 1 |
| 56 | 535  | 105 | N2_50%/CO2_50%       |       |        |      |       | 0 |
| 57 | 500  | 130 | N2_80%/CO2_20%       | 19.65 | 875.50 |      | 19.42 | 1 |
| 58 | 500  | 130 | N2_80%/CO2_20%       | 19.48 | 873.90 |      | 19.80 | 1 |
| 59 | 500  | 130 | N2_80%/CO2_20%       | 19.56 | 874.65 |      | 19.21 | 1 |
| 60 | 502  | 130 | N2_80%/CO2_20%       |       |        |      |       | 0 |
| 61 | 1070 | 100 | Nitrogen_50%/CO2_50% | 39.77 | 758.50 | 4.50 | 18.40 | 1 |
| 62 | 1070 | 100 | Nitrogen_50%/CO2_50% | 39.80 | 758.65 | 4.26 | 17.24 | 1 |
| 63 | 1072 | 100 | Nitrogen_50%/CO2_50% | 39.75 | 758.15 | 3.09 | 17.19 | 1 |
| 64 | 1070 | 100 | Nitrogen_50%/CO2_50% |       |        |      |       | 0 |
| 65 | 1000 | 100 | Nitrogen_60%/CO2_40% | 38.31 | 779.25 | 4.58 | 18.63 | 1 |
| 66 | 1050 | 100 | Nitrogen_60%/CO2_40% | 40.02 | 778.45 | 4.57 | 17.42 | 1 |
| 67 | 1050 | 100 | Nitrogen_60%/CO2_40% | 39.84 | 777.75 | 4.36 | 16.15 | 1 |
| 68 | 1050 | 100 | Nitrogen_60%/CO2_40% |       |        |      |       | 0 |
| 69 | 1050 | 115 | Nitrogen_60%/CO2_40% | 39.22 | 801.40 | 4.37 | 15.79 | 1 |
| 70 | 1050 | 115 | Nitrogen_60%/CO2_40% | 39.86 | 804.00 | 4.57 | 16.92 | 1 |
| 71 | 1050 | 115 | Nitrogen_60%/CO2_40% | 39.39 | 802.10 | 5.16 | 15.70 | 1 |
| 72 | 1050 | 115 | Nitrogen_60%/CO2_40% |       |        |      |       | 0 |
| 73 | 1000 | 115 | Nitrogen_80%/CO2_20% | 39.63 | 850.55 |      | 12.53 | 1 |
| 74 | 1000 | 115 | Nitrogen_80%/CO2_20% | 39.62 | 850.55 |      | 12.10 | 1 |
| 75 | 1000 | 115 | Nitrogen_80%/CO2_20% | 39.55 | 850.20 |      | 11.38 | 1 |
| 76 | 1000 | 115 | Nitrogen_80%/CO2_20% |       |        |      |       | 0 |
| 77 | 500  | 115 | Nitrogen_80%/CO2_20% | 19.45 | 847.20 |      | 38.84 | 1 |
| 78 | 500  | 115 | Nitrogen_80%/CO2_20% | 19.16 | 844.50 |      | 39.04 | 1 |
| 79 | 500  | 115 | Nitrogen_80%/CO2_20% | 19.32 | 846.05 |      | 35.43 | 1 |
| 80 | 500  | 115 | Nitrogen_80%/CO2_20% |       |        |      |       | 0 |
| 81 | 500  | 100 | Nitrogen_80%/CO2_20% | 19.79 | 822.35 |      | 46.74 | 1 |

|     |     |     |                         |       |        |  |            |   |
|-----|-----|-----|-------------------------|-------|--------|--|------------|---|
| 82  | 500 | 100 | Nitrogen_80%/CO2<br>20% | 19.48 | 819.60 |  | 49.87      | 1 |
| 83  | 500 | 100 | Nitrogen_80%/CO2<br>20% | 19.86 | 822.95 |  | 47.94      | 1 |
| 84  | 500 | 100 | Nitrogen_80%/CO2<br>20% |       |        |  |            | 0 |
| 85  | 500 | 85  | Nitrogen_80%/CO2<br>20% | 19.95 | 795.50 |  | 58.29      | 1 |
| 86  | 500 | 85  | Nitrogen_80%/CO2<br>20% | 19.93 | 795.25 |  | 64.65      | 1 |
| 87  | 500 | 85  | Nitrogen_80%/CO2<br>20% | 19.95 | 795.45 |  | 66.06      | 1 |
| 88  | 500 | 85  | Nitrogen_80%/CO2<br>20% |       |        |  |            | 0 |
| 89  | 463 | 120 | Nitrogen_100%           | 19.1  | 917.5  |  | 6.113      | 1 |
| 90  | 464 | 120 | Nitrogen_100%           | 19.13 | 917.4  |  | 5.567      | 1 |
| 91  | 463 | 120 | Nitrogen_100%           | 19.14 | 917.9  |  | 5.648      | 1 |
| 92  | 464 | 120 | Nitrogen_100%           | 19.35 | 920    |  |            | 0 |
| 93  | 464 | 105 | Nitrogen_100%           | 19.6  | 892.1  |  | 11.72      | 1 |
| 94  | 464 | 105 | Nitrogen_100%           | 19.45 | 890.5  |  | 12.08<br>9 | 1 |
| 95  | 464 | 105 | Nitrogen_100%           | 19.46 | 890.6  |  | 11.64<br>4 | 1 |
| 96  | 466 | 105 | Nitrogen_100%           | 19.8  | 890    |  |            | 0 |
| 97  | 464 | 92  | Nitrogen_100%           | 20.02 | 869.65 |  | 20.16<br>2 | 1 |
| 98  | 464 | 92  | Nitrogen_100%           | 19.88 | 868.3  |  | 20.2       | 1 |
| 99  | 464 | 92  | Nitrogen_100%           | 19.83 | 867.8  |  | 20.68<br>2 | 1 |
| 100 | 467 | 92  | Nitrogen_100%           | 20.51 | 870    |  |            | 0 |
